# Supplementary material
Source: PubMed Central journal article supplement (PMC7485544)
Supplement: mmc1.pdf [file mmc1.pdf]

# Smartphone Biosensor With App Meets FDA/ISO Standards for Clinical Pulse Oximetry and Can Be Reliably Used by a Wide Range of Patients

*Sara H. Browne, MD; Mike Bernstein, BEng; Samuel C. Pan, MD;  
Jonathan Gonzalez Garcia, MD; Craig A. Easson, MSc Eng; Chung-Che Huang, MSc Eng;  
and Florin Vaida, PhD*

CHEST 2021; 159(2):724-732

*Online supplements are not copyedited prior to posting and the author(s) take full responsibility for the accuracy of all data.*

© 2020 AMERICAN COLLEGE OF CHEST PHYSICIANS. Reproduction of this article is prohibited without written permission from the American College of Chest Physicians. See online for more details. DOI: 10.1016/j.chest.2020.08.2104

**e-Table 1:** Sensitivity analysis: Out-patient Study (n=250) - Comparison of bias (accuracy), standard deviation (precision), and root mean square deviation of the Test (Smartphone biosensor with APP) and Reference (Welch Allyn Spot Vital Signs) measurement systems, for heart rate and SpO<sub>2</sub>. This sensitivity analysis excluded outlier measurements (observations  $\geq 3$  standard deviations in absolute value) as follows: HR: n=24 observations from 15 participants excluded, (Test n=18, Reference, n=6); SpO<sub>2</sub>: n=18 observations from 18 participants excluded (Test n=14, Reference n=4). Bias and standard deviation correspond to  $\beta_2$  and  $SD(\varepsilon_{ij})$  in model equation (2). The bias comparison used the Wald test of mixed effects linear model. The standard deviation comparison used the likelihood ratio test of the mixed-effects linear model.

| Outliers Removed                     | Bias (Accuracy) Test vs Reference System |           |         | Standard Deviation (Precision) Each System |                   |         | Root Mean Square Deviation Each System |                   |
|--------------------------------------|------------------------------------------|-----------|---------|--------------------------------------------|-------------------|---------|----------------------------------------|-------------------|
|                                      | Test                                     | Reference | P-value | Test                                       | Reference         | P-value | Test                                   | Reference         |
| <b>Out-patient Study</b>             |                                          |           |         |                                            |                   |         |                                        |                   |
| Heart Rate, bpm (95% CI)             | 0.18 (-0.10, 0.46)                       | 0 (ref)   | 0.21    | 4.04 (3.78, 4.32)                          | 3.32 (3.11, 3.55) | <0.001  | 4.04 (3.66, 4.43)                      | 3.32 (3.11, 3.55) |
| SpO <sub>2</sub> , % points (95% CI) | 0.54 (0.45, 0.63)                        | 0 (ref)   | <0.001  | 0.94 (0.90, 0.99)                          | 1.04 (0.99, 1.09) | 0.058   | 1.08 (0.98, 1.18)                      | 1.04 (0.99, 1.09) |

Ref – reference; bpm – beat per minute; Test – Smartphone sensor with App; Reference – Welch Allyn Spot Vital Signs.

**e-Table 2:** Sensitivity analysis: Out-patient Study (n=250) - Comparison of bias (accuracy) and standard deviation (precision) for heart rate and SpO<sub>2</sub> *within* the Test (Smartphone sensor with App) and the Reference (Welch Allyn Spot Vital Signs) measurement systems. This sensitivity analysis excluded n=24 outliers for heart rate, and n=18 outliers for SpO<sub>2</sub>. Between-units bias corresponds to  $\beta_3$  (test units) and to  $\beta_4$  (reference units), and standard deviations correspond  $SD(\varepsilon_{ij})$  in model equation (2) (See Methods). The bias comparison used the Wald test of mixed effects linear model. The standard deviation comparison used the likelihood ratio test of the mixed-effects linear model.

| Outliers Removed            | Model           | Bias (Accuracy) Within System        |         | Std. Deviation (Precision) Within System |                   |         |
|-----------------------------|-----------------|--------------------------------------|---------|------------------------------------------|-------------------|---------|
|                             |                 | Unit <sub>1</sub> -Unit <sub>2</sub> | P-value | Unit <sub>1</sub>                        | Unit <sub>2</sub> | P-value |
| Heart Rate (bpm)            | Test Units      | 0.10 (-0.32, 0.52)                   | 0.63    | 4.16 (3.84, 4.49)                        | 4.04 (3.74, 4.37) | 0.53    |
|                             | Reference Units | -0.43 (-0.71, -0.16)                 | 0.002   | 3.16 (2.92, 3.41)                        | 3.53 (3.27, 3.82) | 0.009   |
| SpO <sub>2</sub> (% points) | Test Units      | -0.02 (-0.15, 0.11)                  | 0.76    | 1.10 (1.05, 1.15)                        | 0.99 (0.94, 1.04) | 0.034   |
|                             | Reference Units | 0.52 (0.41, 0.63)                    | <0.001  | 1.00 (0.95, 1.05)                        | 0.87 (0.83, 0.91) | 0.005   |

Ref – reference; bpm – beat per minute; Test Units – In phone; Reference Units – Welch Allyn Spot Vital Signs.
